# Supplementary material for: Dynamic metabolic profiling together with transcription analysis reveals salinity-induced starch-to-lipid biosynthesis in alga Chlamydomonas sp. JSC4
Source: PubMed Central journal article supplement (PMC5379629; doi:10.1038/srep45471), 2017-04-04
Supplement: srep45471-s1.pdf [file srep45471-s1.pdf]

# Dynamic metabolic profiling together with transcription analysis reveals salinity-induced starch-to-lipid biosynthesis in alga *Chlamydomonas* sp. JSC4

Shih-Hsin Ho, Akihito Nakanishi, Yuichi Kato, Hiroaki Yamasaki, Jo-Shu Chang, Naomi Misawa, Yuu Hirose, Jun Minagawa, Tomohisa Hasunuma\*, Akihiko Kondo.

Supplementary Figure S1. TEM micrographs of JSC4 cultivated under 0% and 2% SS.

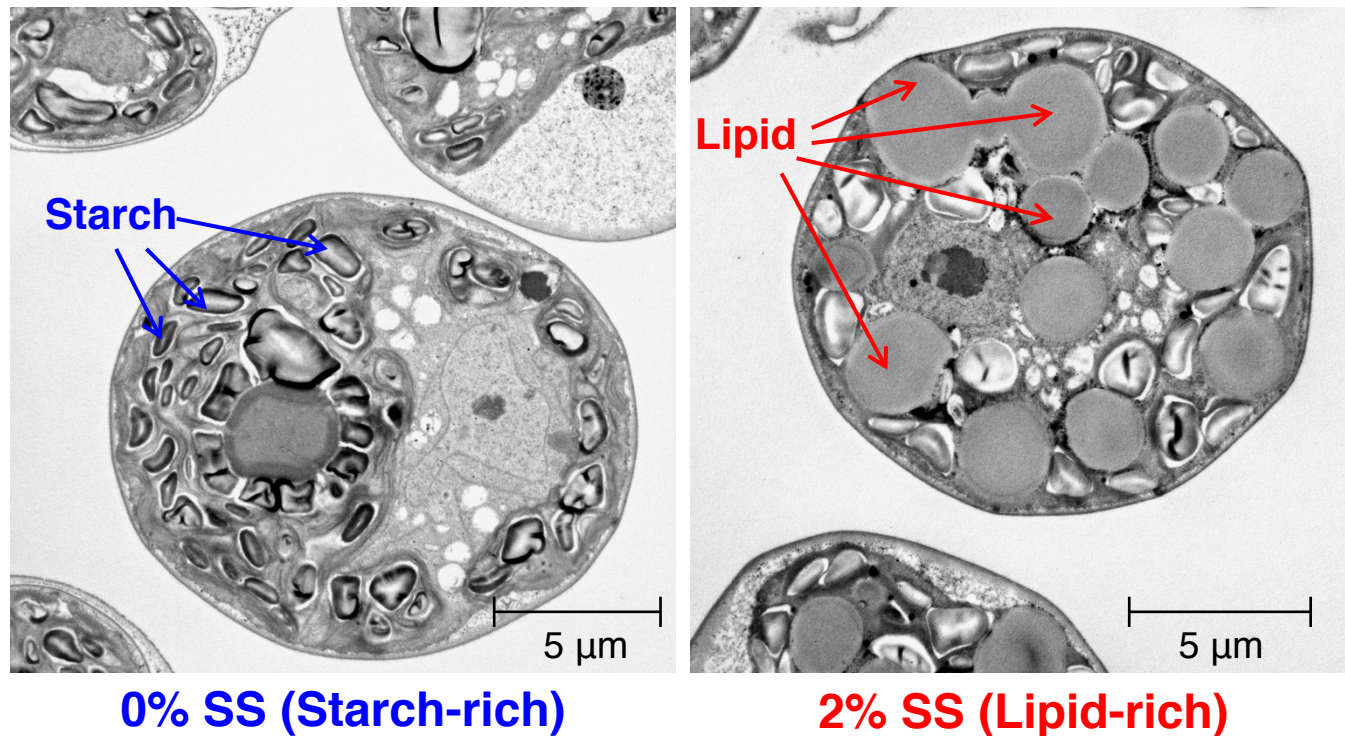

## Supplementary Figure S2. Time course of $^{13}\text{C}$ fraction under different SS concentrations (0% and 2%) at Days 3, 5, and 7.

○ (pink) and ● (blue) indicate 0% SS and 2% SS, respectively. Error bars indicate the SD of three replicate experiments (\*:  $p < 0.05$  by Student's t-test).

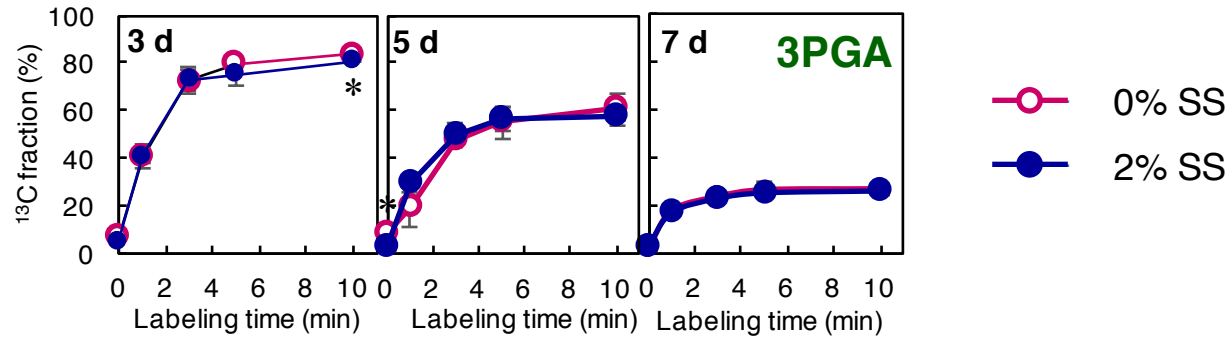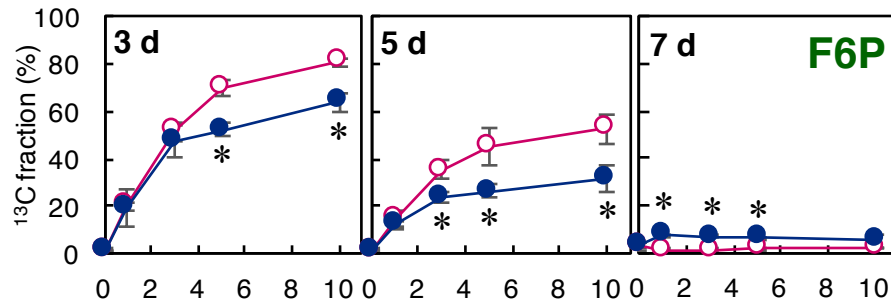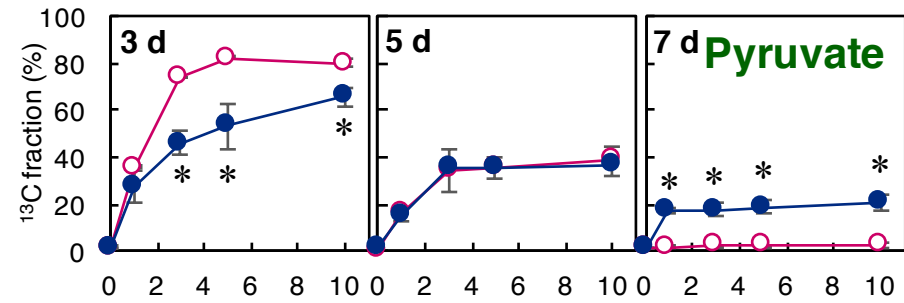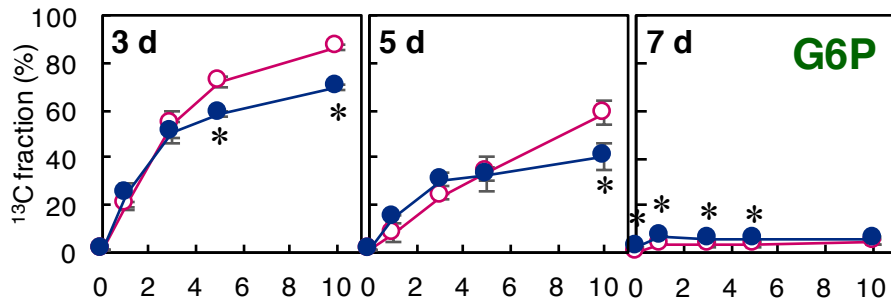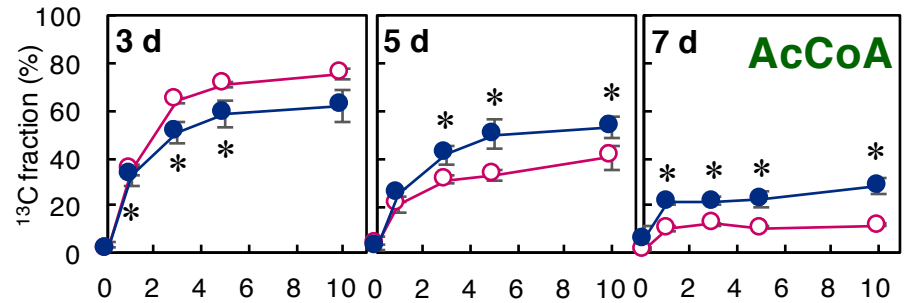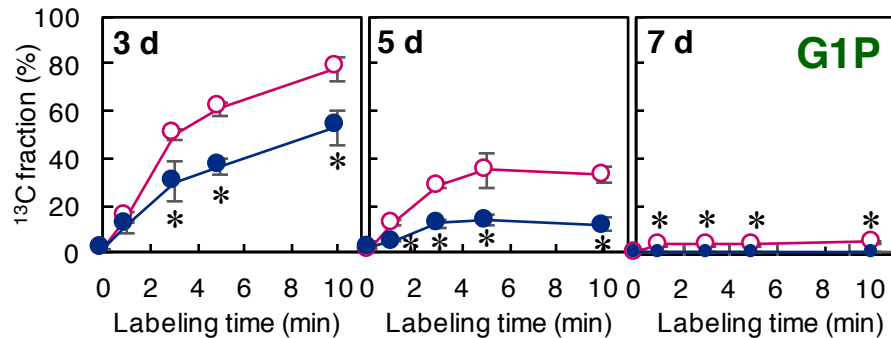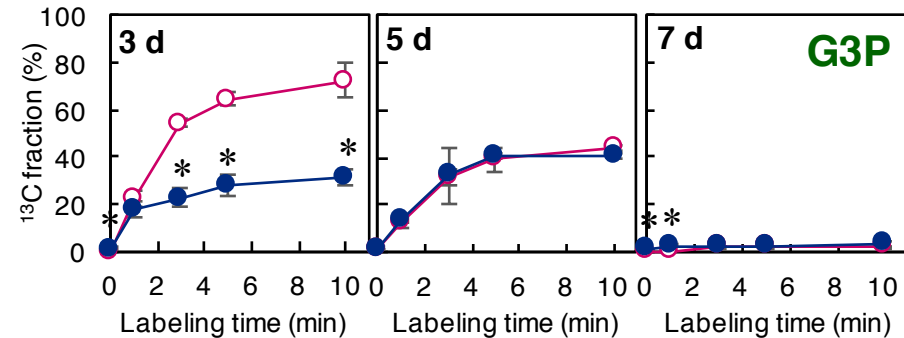

**Supplementary Table S1. Comparison of lipid productivity of *Chlamydomonas* sp. JSC4 with those of other green algae, as reported in the literature.**

| Strain                                  | Biomass productivity<br>(mg L <sup>-1</sup> d <sup>-1</sup> ) | Lipid productivity<br>(mg L <sup>-1</sup> d <sup>-1</sup> ) | Reference  |
|-----------------------------------------|---------------------------------------------------------------|-------------------------------------------------------------|------------|
| <i>Nannochloropsis</i> sp. F&M-M24      | 180                                                           | 55                                                          | 1          |
| <i>Dunaliella tertiolecta</i> ATCC30929 | 100                                                           | 70                                                          | 2          |
| <i>Isochrysis zhangjiangensis</i>       | 345                                                           | 141                                                         | 3          |
| <i>Nannochloropsis oculata</i> NCTU-3   | 480                                                           | 142                                                         | 4          |
| <i>Chlorella vulgaris</i>               | 358                                                           | 167                                                         | 5          |
| <i>Chlorella sorokiniana</i>            | 246                                                           | 189                                                         | 6          |
| <i>Chlamydomonas</i> sp. JSC4 (1% SS)   | 775                                                           | 358                                                         | This study |

1. Rodolfi, L. *et al.* Microalgae for oil: Strain selection, induction of lipid synthesis and outdoor mass cultivation in a low-cost photobioreactor. *Biotechnol. Bioeng.* **102**, 100-112 (2009).
2. Takagi, M., Karseno & Yoshida, T. Effect of salt concentration on intracellular accumulation of lipids and triacylglyceride in marine microalgae *Dunaliella* cells. *J. Biosci. Bioeng.* **101**, 223-226 (2006).
3. Feng, D., Chen, Z., Xue, S. & Zhang, W. Increased lipid production of the marine oleaginous microalgae *Isochrysis zhangjiangensis* (Chrysophyta) by nitrogen supplement. *Bioresour. Technol.* **102**, 6710-6716 (2011).
4. Chiu, S. Y. *et al.* Lipid accumulation and CO<sub>2</sub> utilization of *Nannochloropsis oculata* in response to CO<sub>2</sub> aeration. *Bioresour. Technol.* **100**, 833-838 (2009).
5. Chen, W. *et al.* A high throughput Nile red method for quantitative measurement of neutral lipids in microalgae. *J. Microbiol. Methods* **77**, 41-47 (2009).
6. Chen, C. Y. *et al.* Enhancing microalgal oil/lipid production from *Chlorella sorokiniana* CY1 using deep-sea water supplemented cultivation medium. *Biochem. Eng. J.* **77**, 74-81 (2013).

## Supplementary Table S2.

### Sequences of primers used for qPCR.

| Primer name   | Definition                            | Primer sequence (5' to 3') |
|---------------|---------------------------------------|----------------------------|
| RPL32 F       | Ribosomal protein L32                 | acaagaagactcgccacacg       |
| RPL32 R       |                                       | cgttgatgacgcagatgtg        |
| PGI F         | Phosphoglucose isomerase              | cacgaccatacaccccaatc       |
| PGI R         |                                       | gccttgttccacaccatcc        |
| PGM F         | Phosphoglucomutase                    | tcagccgctacgactacgag       |
| PGM R         |                                       | cggacagggcggaaaatg         |
| AGPP F        | ADP-glucose phosphorylase             | aactccacctgctcaacc         |
| AGPP R        |                                       | ctcgatggccctgttctg         |
| SP1 F         | Starch phosphorylase 1                | tctacttctgcccgactacaac     |
| SP1 R         |                                       | gaacacgaacacctcctccac      |
| SP2 F         | Starch phosphorylase 2                | aacaccaccacctcaacaac       |
| SP2 R         |                                       | gatttcatgcaccaagccatac     |
| AMY1 F        | $\alpha$ -Amylase 1                   | tcagcgtcggaaatcaaacc       |
| AMY1 R        |                                       | taaacacctccgtccatctcacc    |
| AMY2 F        | $\alpha$ -Amylase 2                   | catcaagatcaacggcaagg       |
| AMY2 R        |                                       | cgcaacagcacatacacagg       |
| PFOR F        | Pyruvate ferredoxin oxidoreductase    | cgtggcgggtgttgaga          |
| PFOR R        |                                       | ggtgttgctggcgatga          |
| PDH F         | Pyruvate dehydrogenase                | acctgccccttatcgtcacc       |
| PDH R         |                                       | gtggttcgctcttgcgtacc       |
| PDC F         | Pyruvate decarboxylase                | acgcgtatgggtaagatacag      |
| PDC R         |                                       | atagcgcgagaaaaccgttg       |
| ALDH F        | Aldehyde dehydrogenase                | tcgtgcacgagtctgtatacag     |
| ALDH R        |                                       | ttgttgactggcgcgtgc         |
| ACS1 F        | AcCoA synthetase 1                    | caccctgcctcaatagtgtcc      |
| ACS1 R        |                                       | atggctcggcttcttctcc        |
| ACS2 F        | AcCoA synthetase 2                    | cccgtcaacatccagttcttc      |
| ACS2 R        |                                       | tctggcggatgtgattgtg        |
| ACS3 F        | AcCoA synthetase 3                    | ctggagcaagccatatacaac      |
| ACS3 R        |                                       | ccctcccagtagaacgcaac       |
| GPDH F        | Glycerol 3-phosphate dehydrogenase    | aacacgctgcacgaaaacac       |
| GPDH R        |                                       | ttgctgacgcagatgatgg        |
| BCCP F        | Biotin carboxyl carrier protein       | aaatgcagctcaacctgacg       |
| BCCP R        |                                       | cgtcgaacgccatcatgttc       |
| BC F          | Biotin carboxylase                    | tggagatgaacaccgcacc        |
| BC R          |                                       | acacgatgtctctctgcttg       |
| $\alpha$ CT F | carboxyl transferase $\alpha$ subunit | aacctcatcatgcagaacgc       |
| $\alpha$ CT R |                                       | tccatgacgccgaacttgac       |
| $\beta$ CT F  | carboxyl transferase $\beta$ subunit  | caagatggccaaggctgttg       |
| $\beta$ CT R  |                                       | ttgcagccaagcagatgtg        |
